# Supplementary material for: Reusable nickel foam supported 3D hierarchical Co–Fe–Ni mixed metal oxides with peroxidase-like activity as biosensors for the colorimetric detection of H2O2
Source: Royal Society of Chemistry journal article supplement (doi:10.1039/d3nj00127j), 2023-01-01
Supplement: d3nj00127j1.pdf [file d3nj00127j1.pdf]

## Electronic Supplementary Material (ESI) for New Journal of Chemistry

### Reusable nickel foam supported 3D hierarchical Co-Fe-Ni mixed metal oxides with peroxidase-like activity as biosensor for colorimetric detection of H<sub>2</sub>O<sub>2</sub><sup>†</sup>

Tao Wu<sup>a</sup>, Fangyuan Liu<sup>a</sup>, Xiangrong Lyu<sup>a</sup>, Fengze Wu<sup>a</sup>, Hui Zhao<sup>a</sup>, Yan Xin<sup>a</sup>, Leixuan Li<sup>a</sup>, Gaochao Fan<sup>b</sup>, Xixi Zhu<sup>\*a</sup>, and Qingyun Liu<sup>\*a</sup>

a.College of Chemical and Biological Engineering, Shandong University of Science and Technology, Qingdao 266590, China.

b.Shandong Key Laboratory of Biochemical Analysis, College of Chemistry and Molecular Engineering, Qingdao University of Science and Technology, Qingdao 266042, China.

\*Corresponding Author, zhuxixi@sdust.edu.cn; qyliu@sdust.edu.cn

## Supplementary information:

**Reagents and materials.** Nickel nitrate ( $\text{Ni}(\text{NO}_3)_2 \cdot 6\text{H}_2\text{O}$ ), Iron nitrate ( $\text{Fe}(\text{NO}_3)_3 \cdot 9\text{H}_2\text{O}$ ), Cobalt nitrate ( $\text{Co}(\text{NO}_3)_2 \cdot 6\text{H}_2\text{O}$ ), sodium chloride ( $\text{NaCl}$ ), sodium sulfate ( $\text{Na}_2\text{SO}_4$ ), sodium carbonate ( $\text{Na}_2\text{CO}_3$ ), magnesium chloride ( $\text{MgCl}_2$ ), calcium chloride ( $\text{CaCl}_2$ ), and 3,3,5,5-Tetramethylbenzidine ( $\text{TMB} \cdot 2\text{HCl}$ ) were purchased from Macklin (Shanghai, China). Humic acid, Glucose, Urea, Arginine, Sodium dodecyl sulfate (SDS), Hydrogen peroxide (30%,  $\text{H}_2\text{O}_2$ ) was bought from Sinopharm Chemical Reagent Co., Ltd. (Shanghai, China). Ni foam was purchased from Kunshan Guangjiayuan New Materials Co., Ltd (Kunshan, China). All of reagents are analytical grade and used directly without any further purification. Ultrapure water used throughout the experiment was prepared by the floc water purification system.

**Characterization.** The crystallinity of the products was analyzed by Rigaku D/Max2500PC powder X-ray diffractometer with Cu  $K\alpha$  radiation (Rigaku, Japan,  $U = 40 \text{ kV}$ ,  $I = 40 \text{ mA}$ , and  $2\theta = 5\text{--}80^\circ$ ). The morphology and composition of the samples were verified by scanning electron microscopy (FEI APREO, America) equipped with energy-dispersive X-ray spectroscopy (EDS) under a 200 kV accelerating voltage. The surface elemental composition and valence analysis were performed on X-ray photoelectron spectroscopy (XPS, Thermo ESCALAB 250Xi). All of the XPS spectra were calibrated to the C 1s peak of adventitious carbon (284.8 eV). The electron spin resonance (ESR) spectra were carried out using a Bruker ESP-300E ESR spectrometer at room temperature (Bruker, Germany). UV-vis absorption spectra were obtained on a UV-8000PC spectrophotometer (Puxi, China).

**Table S1.** Experimental conditions of different experiment

| Experiment name        | $C_{TMB}(\text{mM})$ | $C_{H_2O_2}(\text{mM})$ | $t$ ( $^{\circ}\text{C}$ ) | pH   |
|------------------------|----------------------|-------------------------|----------------------------|------|
| pH effect              | 1                    | 250                     | 30                         | 3-8  |
| Temperature effect     | 1                    | 250                     | 25-60                      | 4.17 |
| kinetic experiment (1) | 0.05-0.75            | 250                     | 30                         | 4.17 |
| kinetic experiment (2) | 1                    | 1-60                    | 30                         | 4.17 |

**Table S2.** Kinetic parameters ( $K_m$  and  $V_{max}$ ) of various nanozymes.

| Nanozymes                                      | $K_m/\text{mM}$ |                        | $V_{max}/10^{-8}\text{Ms}^{-1}$ |                        | Ref.      |
|------------------------------------------------|-----------------|------------------------|---------------------------------|------------------------|-----------|
|                                                | TMB             | $\text{H}_2\text{O}_2$ | TMB                             | $\text{H}_2\text{O}_2$ |           |
| Co/Fe-NiO@NF                                   | 0.213           | 12.130                 | 9.360                           | 9.710                  | This work |
| HRP                                            | 0.434           | 3.700                  | 10.00                           | 8.710                  | [1]       |
| Ni-MOF                                         | 0.365           | 2.490                  | 6.530                           | 130.0                  | [2]       |
| N-doped<br>graphene/ $\text{ZnFe}_2\text{O}_4$ | 0.907           | 115.520                | 9.710                           | 7.440                  | [3]       |
| Au/ $\text{CeO}_2$ CSNPs                       | 0.290           | 44.69                  | 3.900                           | 2.230                  | [4]       |
| Cu NCs                                         | 0.648           | 29.16                  | 5.96                            | 4.22                   | [5]       |
| Cu-Ag/rGO                                      | 0.85            | 20.93                  | 3.82                            | 6.23                   | [6]       |

**Table S3.** Various methods for H<sub>2</sub>O<sub>2</sub> detection.

| Detection Method                       | Sensor Type                                                                         | Linear Range | Detection Limit | Ref.      |
|----------------------------------------|-------------------------------------------------------------------------------------|--------------|-----------------|-----------|
| Colorimetry                            | Ce/ZnCo <sub>2</sub> O <sub>4</sub>                                                 | 0.2-1 mM     | 175 μM          | [7]       |
| Colorimetry                            | GO-FeTPyP                                                                           | 0.02-0.5 mM  | 72 μM           | [8]       |
| Colorimetry                            | GA-AgNP                                                                             | 1-8 mM       | 340 μM          | [9]       |
| Colorimetry                            | Co <sub>3</sub> O <sub>4</sub> /BiPc(OC <sub>8</sub> H <sub>9</sub> ) <sub>12</sub> | 3-20 mM      | 350 μM          | [10]      |
| Colorimetry                            | CDs@ZIF-8                                                                           | 0.1-1 mM     | 3.6 μM          | [11]      |
| Electrochemical method                 | MnO <sub>2</sub> -NWs@Au-NPs/GF                                                     | 0.01-9.5 mM  | 1.9 μM          | [12]      |
| Electrochemical method                 | ITO-rGO-AuNPs                                                                       | 0.025-3 mM   | 6.5 μM          | [13]      |
| Fluorescence                           | MoO <sub>x</sub> QDs@Co/Zn-MOFs                                                     | 2-150 μM     | 32.6 pmol       | [14]      |
| High performance liquid chromatography | -----                                                                               | -----        | 0.1 μM          | [15]      |
| Colorimetry                            | Co/Fe-NiO@NF                                                                        | 0.2-4 mM     | 32.9 μM         | This work |

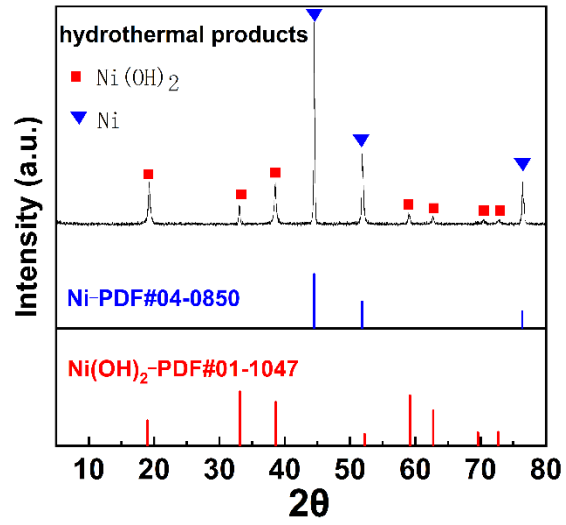

Figure S1. XRD spectra of the sample before calcination.

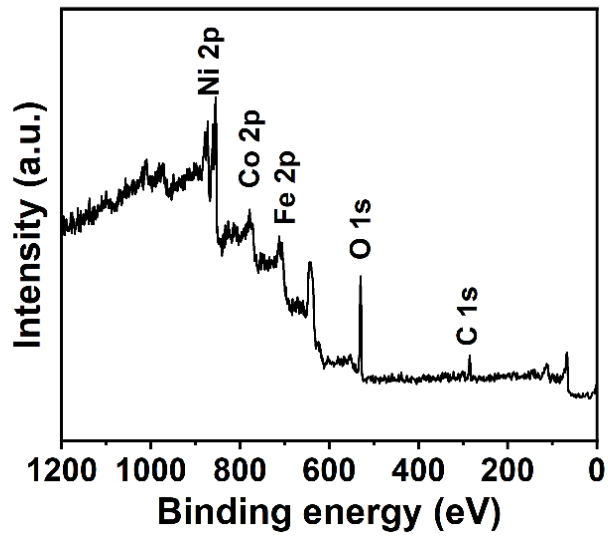

Figure S2. Survey XPS spectra of Co/Fe-NiO@NF

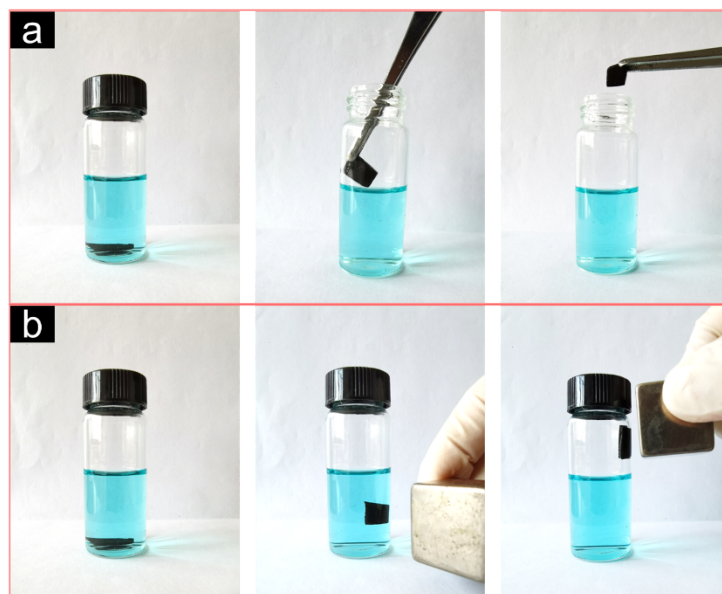

**Figure S3.** Easy separation of Co/Fe-NiO@NF by tweezers (a) and magnet (b).

## References

- (1) L. Gao, J. Zhuang, L. Nie, J. Zhang, Y. Zhang, N. Gu, T. Wang, J. Feng, D. Yang, S. Perrett, X. Yan, Intrinsic peroxidase-like activity of ferromagnetic nanoparticles, *Nat. Nanotechnol.*, 2007, **2(9)**, 577-583. DOI: 10.1038/nnano.2007.260.
- (2) J. Chen, Y. Shu, H. Li, Q. Xu, X. Hu, Nickel metal-organic framework 2D nanosheets with enhanced peroxidase nanozyme activity for colorimetric detection of H<sub>2</sub>O<sub>2</sub>, *Talanta*, 2018, **189**, 254-261. DOI: 10.1016/j.talanta.2018.06.075.

- (3) D. Navadeepthy, A. Rebekah, C. Viswanathan, N. Ponpandan, N-doped Graphene/ZnFe<sub>2</sub>O<sub>4</sub>: A novel nanocomposite for intrinsic peroxidase based sensing of H<sub>2</sub>O<sub>2</sub>, Mater. Res. Bull., 2017, **95**, 1-8. DOI: 10.1016/j.materresbull.2017.06.033.
- (4) S. Bhagat, N. V. Srikanth Vallabani, V. Shutthanandan, M. Bowden, A. S. Karakoti, S. Singh, Gold core/ceria shell-based redox active nanozyme mimicking the biological multienzyme complex phenomenon, J. Colloid Interf. Sci., 2018, **513**, 831-842. DOI: 10.1016/j.jcis.2017.11.064.
- (5) L. Hu, Y. Yuan, L. Zhang, J. Zhao, S. Majeed, G. Xu, Copper nanoclusters as peroxidase mimetics and their applications to H<sub>2</sub>O<sub>2</sub> and glucose detection, Anal. Chim. Acta, 2013, **762**, 83-86. DOI: 10.1016/j.aca.2012.11.056.
- (6) G. Darabdhara, B. Sharma, M. R. Das, R. Boukherroub, S. Szunerits, Cu-Ag bimetallic nanoparticles on reduced graphene oxide nanosheets as peroxidase mimic for glucose and ascorbic acid detection, Sensor. Actuat. B-Chem., 2017, **238**, 842-851. DOI: 10.1016/j.snb.2016.07.106.
- (7) D. Yin, H. Yang, S. Wang, Z Yang, Q. Liu, X. Zhang, X. Zhang, Ce-doped ZnCo<sub>2</sub>O<sub>4</sub> nanospheres: Synthesis, double enzyme-like performances, catalytic mechanism and fast colorimetric determination for glutathione, Colloid. Surface. A, 2020, **607**, 125466. DOI: 10.1016/j.colsurfa.2020.125466.
- (8) C. Socaci, F. Pogacean, A. R. Biris, M. Coros, M. C. Rosu, L. Magerusan, G. Katona, S. Pruneanu, Graphene oxide vs. Reduced graphene oxide as carbon support in porphyrin peroxidase biomimetic nanomaterials, Talanta, 2016, **148**, 511-517. DOI: 10.1016/j.talanta.2015.11.023.

- (9) V. Doan, V. Nguyen, T. Nguyen, A. Nguyen, T. Nguyen, Highly sensitive and low-cost colourimetric detection of glucose and ascorbic acid based on silver nanozyme biosynthesized by *Gleditsia australis* fruit, *Spectrochim. acta. A*, 2022, **268**, 120709. DOI: 10.1016/j.saa.2021.120709.
- (10) X. Kong, R. Yang, Y. Li, Y. Wei, Y. Sun, H. Lyu, D. Yin, X. Zhu, G. Lu, Q. Liu, Co<sub>3</sub>O<sub>4</sub>-binuclear phthalocyanine nanocomposites with enhanced peroxidase-like activity for sensitive detection of glutathione, *Colloid. Surface. A*, 2021, **615**, 126261. DOI: 10.1016/j.colsurfa.2021.126261.
- (11) Y. Wang, X. Liu, M. Wang, X. Wang, W. Ma, J. Li, Facile synthesis of CDs@ZIF-8 nanocomposites as excellent peroxidase mimics for colorimetric detection of H<sub>2</sub>O<sub>2</sub> and glutathione, *Sensor. Actuat. B-Chem.*, 2021, **329**, 129115. DOI: 10.1016/j.snb.2020.129115.
- (12) L.M. Malard, M.A. Pimenta, G. Dresselhaus, M.S. Dresselhaus, Raman spectroscopy in graphene, *Phys. Rep.*, 2009, **473**, 51–87, <https://doi.org/10.1016/j.physrep.2009.02.003>.
- (13) B. Patella, M. Buscetta, S. Di Vincenzo, M. Ferraro, G. Aiello, C. Sunseri, E. Pace, R. Inguanta, C. Cipollina, Electrochemical sensor based on rGO/Au nanoparticles for monitoring H<sub>2</sub>O<sub>2</sub> released by human macrophages, *Sensor. Actuat. B-Chem.*, 2021, **327**, 128901. DOI: 10.1016/j.snb.2020.128901.
- (14) Y. Shi, Q. Wu, W. Li, L. Lin, F. Qu, C. Shen, Y. Wei, P. Nie, Y. He, X. Feng, Ultra-sensitive detection of hydrogen peroxide and levofloxacin using a dual-functional fluorescent probe, *J. Hazard. Mater.*, 2022, **432**, 128605. DOI: 10.1016/j.jhazmat.2022.128605.
- (15) H. Yue, X. Bu, M. H. Huang, J. Young, T. Raglione, Quantitative determination of trace levels of hydrogen peroxide in cospovidone and a pharmaceutical product using high



performance liquid chromatography with coulometric detection, *Int. J. Pharm.*, 2009, **375**(1-2), 33–40. DOI: 10.1016/j.ijpharm.2009.03.027.
